# Supplementary material for: Interrogating the immune-modulating roles of radiation therapy for a rational combination with immune-checkpoint inhibitors in treating pancreatic cancer
Source: PubMed Central journal article supplement — J Immunother Cancer. 2020 Jul 16;8(2):e000351. doi: 10.1136/jitc-2019-000351 (PMC7368549; doi:10.1136/jitc-2019-000351), 2020-07-16
Supplement: jitc-2019-000351supp001.pdf [file jitc-2019-000351supp001.pdf]

**Supplementary Materials:****Supplementary figure legends**

**Supplemental Figure S1.** Representative axial images from on-board cone beam CT (CBCT), which was used for image guidance. Fiducials contoured in blue. Isocenter marked in green and 10 mm x 10 mm field size delineated in red with isocenter placed in the middle of fiducials. 8 Gy x 3 fractions delivered daily with an AP-PA field design, at a dose rate of 3 Gy/minute using the Small Animal Radiation Research Platform (SARRP; Xstrahl).

**Supplemental Figure S2.** Growth curves of tumors evaluated by ultrasound imaging. Shown are the control,  $\alpha$ PD-1 alone, RT alone, RT/ $\alpha$ PD-1, RT/IDO1i, and RT/ $\alpha$ PD-1/IDO1i groups.

**Supplemental Figure S3.** The time depending curves of tumor sizes evaluated by ultrasound imaging. Data represent results obtained from experiments with 5 mice per group. The error bars represent mean with standard deviation. \* $P < 0.05$ , \*\*\* $P < 0.001$ ; NS, not significant, by unpaired t-test.

**Supplemental Figure S4.** RNA profiling data. The RNA derived from the tissues of KPC

orthotopic implantation model treated with combinational therapy was analyzed by NanoString Analysis. The data showed the comparison of (A) *Pdcd1*, *Icos*, *Tigit*, (B) *Tlr7*, *Tlr9*, *Nlrp3*, *Ccr3*, *Ccr7*, *Tnfrsf4*, *Tnfrsf18*, *Tgf-b1*, *Pdcd1lg2*, *Ctla4*, *Havcr2*, *Irak3*, *Sting*, *Tlr3*, and (C) *Ido1* expression in the five treatment groups compared to the control group. N = 4 for each treatment group.

**Supplemental Table S1. : Luminex Mouse Reagent Analyte List**

| <b>MCYTMAG-70K-PX32</b>    | <b>MHSTCMAG-70K</b>       | <b>MTH17MAG-47K</b>   |
|----------------------------|---------------------------|-----------------------|
| Eotaxin/CCL11              | GRO alpha/KC/CINC-1/CXCL1 | IL-17E/IL-25          |
| G-CSF                      | IFN gamma                 | IL-17F                |
| GM-CSF                     | IL-1 alpha                | IL-21                 |
| GRO beta/CXCL2/MIP-2 alpha | IL-1 beta                 | IL-22                 |
| IL-12 (p40)                | IL-10                     | IL-23                 |
| IL-15                      | IL-12 (p70)               | IL-27                 |
| IL-3                       | IL-17A/CTLA8              | IL-28B/IFN lambda 3   |
| IL-9                       | IL-2                      | IL-31                 |
| IP-10/CXCL10/CRG-2         | IL-4                      | IL-33/NF-HEV (mature) |
| LIF                        | IL-5                      | MIP-3 alpha/CCL20     |
| M-CSF                      | IL-6                      | TNF-beta/LTA          |
| MIG/CXCL9                  | IL-7                      | sCD40L                |
| MIP-1 alpha/CCL3           | LIX/CXCL6/GCP-2           |                       |
| MIP-1 beta/CCL4            | MCP-1/JE/CCL2             |                       |
| RANTES/CCL5                | TNF-alpha                 |                       |
| VEGF-A                     |                           |                       |
| IL-13                      |                           |                       |
