# Supplementary material for: Interrogating the immune-modulating roles of radiation therapy for a rational combination with immune-checkpoint inhibitors in treating pancreatic cancer
Source: PubMed Central journal article supplement — J Immunother Cancer. 2020 Jul 16;8(2):e000351. doi: 10.1136/jitc-2019-000351 (PMC7368549; doi:10.1136/jitc-2019-000351), 2020-07-16
Supplement: jitc-2019-000351supp005.pdf [file jitc-2019-000351supp005.pdf]

Figure S4

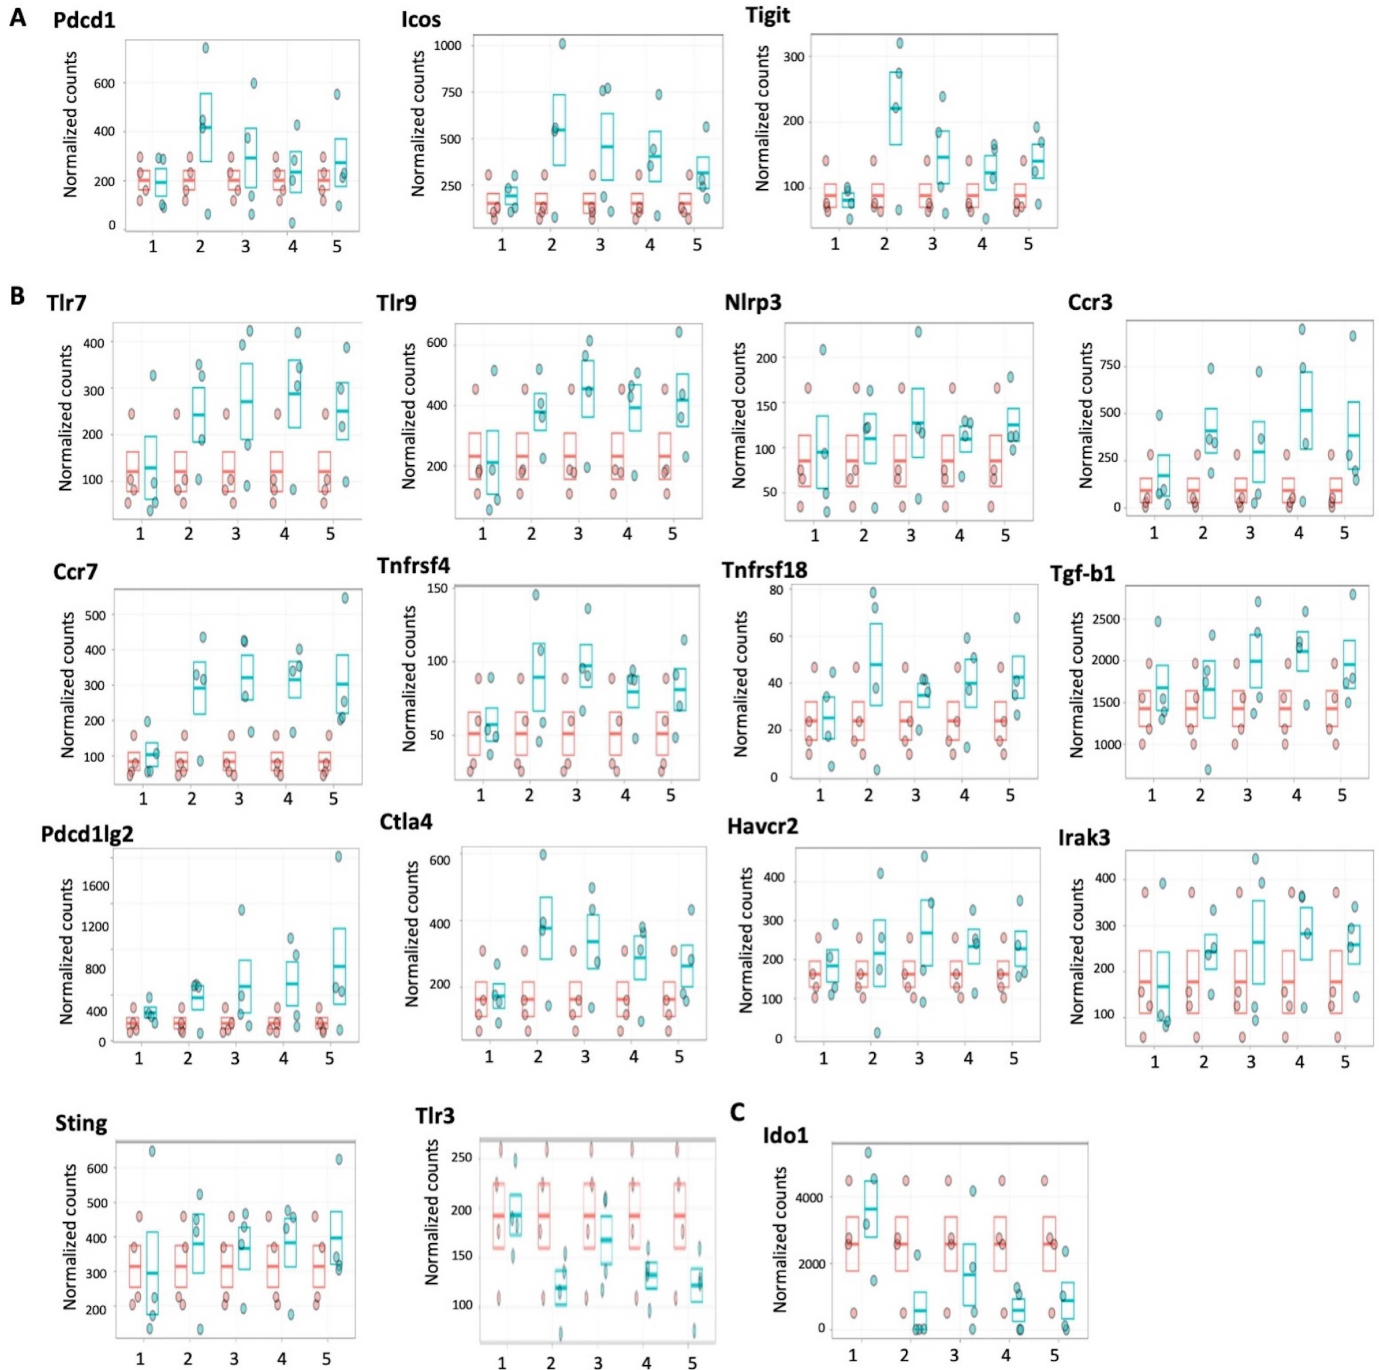

1. IDO1i alone over Vehicle 2. RT +  $\alpha$ PD1 over Vehicle 3. RT +  $\alpha$ PD1 + IDO1i over Vehicle  
 4. RT + IDO1i over Vehicle 5. RT alone over Vehicle  
 — Vehicle — Experiment
