# Supplementary figures and images for: Interrogating the immune-modulating roles of radiation therapy for a rational combination with immune-checkpoint inhibitors in treating pancreatic cancer
Source: PubMed Central journal article supplement — J Immunother Cancer. 2020 Jul 16;8(2):e000351. doi: 10.1136/jitc-2019-000351 (PMC7368549; doi:10.1136/jitc-2019-000351), 2020-07-16

# Figure S1

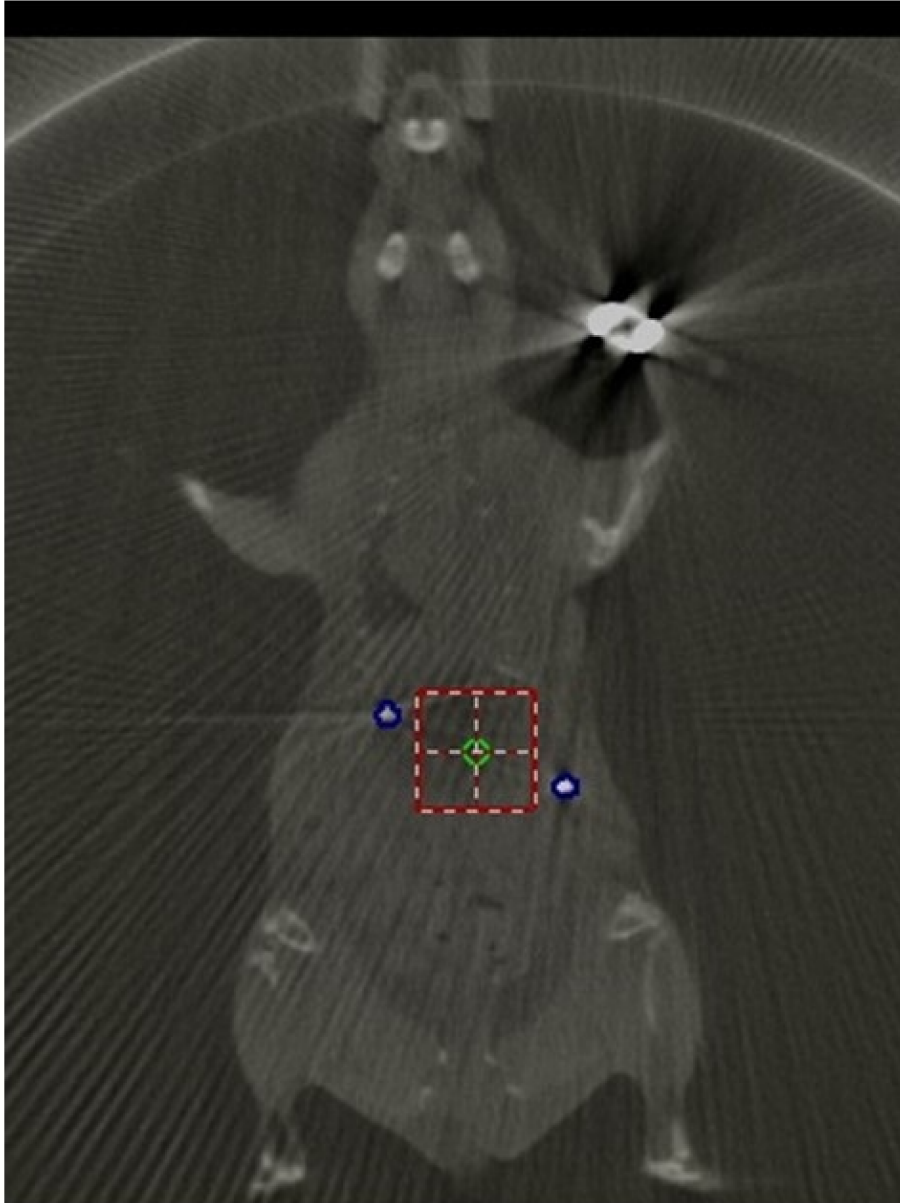

Supplement: jitc-2019-000351supp002.pdf [file jitc-2019-000351supp002.pdf]

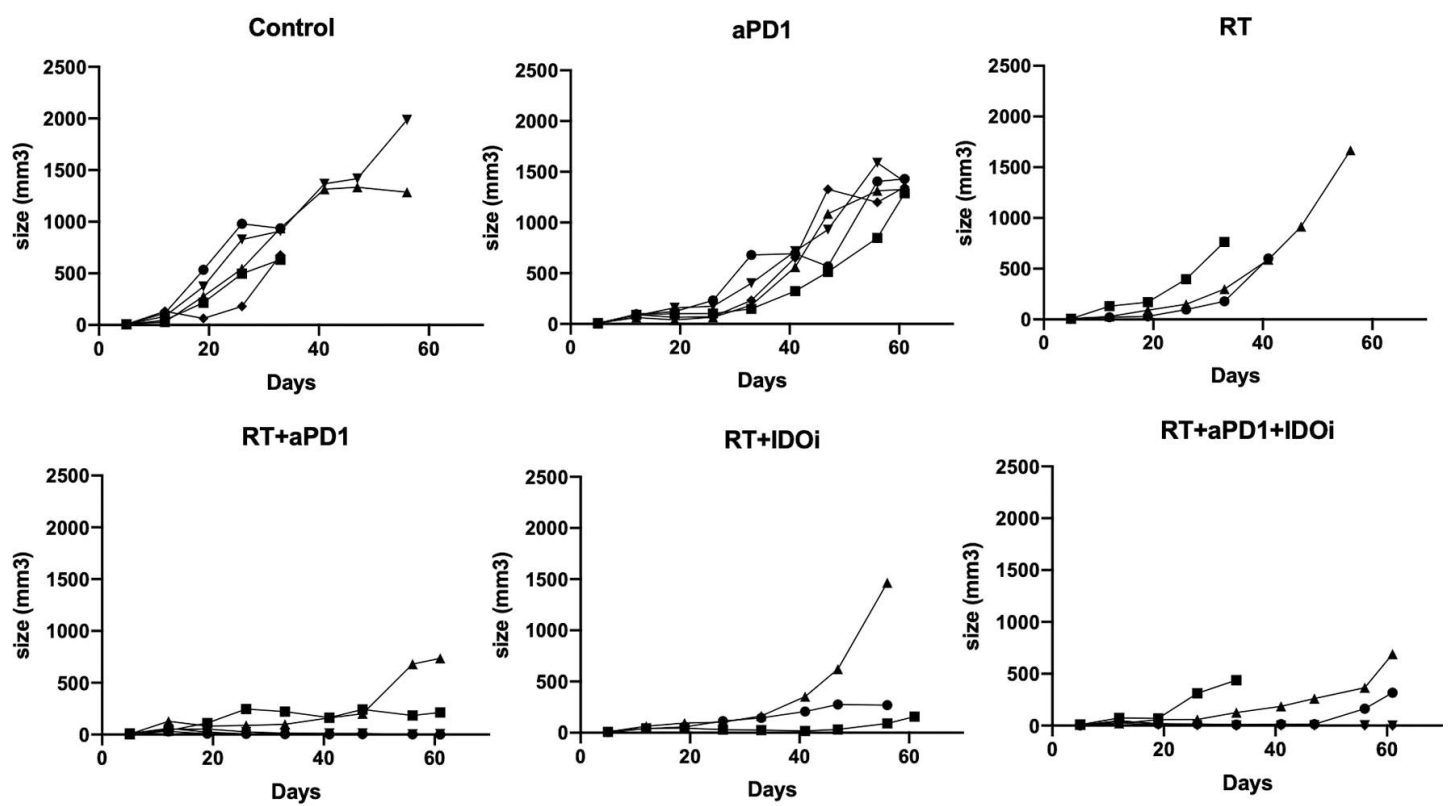

Supplement: jitc-2019-000351supp003.pdf [file jitc-2019-000351supp003.pdf]

Figure S3

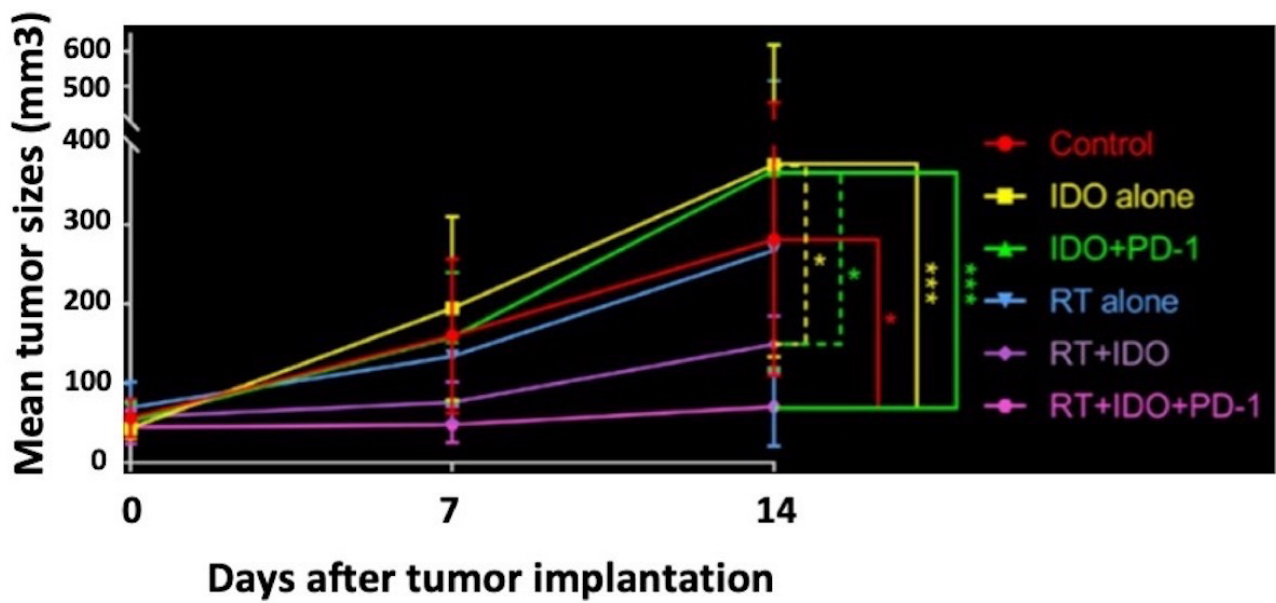

Supplement: jitc-2019-000351supp004.pdf [file jitc-2019-000351supp004.pdf]
